# Supplementary material for: Cerebral White Matter Hyperintensities, Kidney Function Decline, and Recurrent Stroke After Intensive Blood Pressure Lowering: Results From the Secondary Prevention of Small Subcortical Strokes (SPS3) Trial
Source: PubMed Central journal article supplement — J Am Heart Assoc. 2019 Jan 26;8(3):e010091. doi: 10.1161/JAHA.118.010091 (PMC6405594; doi:10.1161/jaha.118.010091), 2019-01-26
Supplement: JAH3-8-e010091-s001.pdf [file JAH3-8-e010091-s001.pdf]

# **SUPPLEMENTAL MATERIAL**

**Table S1. Baseline characteristics of Secondary Prevention of Small Subcortical Strokes trial participants included and excluded in cross-sectional analysis.**

| Characteristic                              | Included (n=2,967) |           | Excluded (n=53) |           | Total (n=3,020) |           |
|---------------------------------------------|--------------------|-----------|-----------------|-----------|-----------------|-----------|
|                                             | No. or mean        | (% or SD) | No. or mean     | (% or SD) | No. or mean     | (% or SD) |
| Age, years                                  | 62.8               | (10.8)    | 64.3            | (10.2)    | 62.8            | (10.8)    |
| Male*                                       | 1,861              | (62.7)    | 41              | (77.4)    | 1,902           | (63.0)    |
| Race                                        |                    |           |                 |           |                 |           |
| White                                       | 1,504              | (50.7)    | 34              | (64.2)    | 1,538           | (50.9)    |
| Hispanic                                    | 903                | (30.4)    | 13              | (24.5)    | 916             | (30.3)    |
| Black                                       | 486                | (16.4)    | 6               | (11.3)    | 492             | (16.3)    |
| Other                                       | 74                 | (2.5)     | 0               | (0.0)     | 74              | (2.5)     |
| Smoking                                     |                    |           |                 |           |                 |           |
| Never                                       | 1,175              | (39.6)    | 21              | (39.6)    | 1,196           | (39.6)    |
| Former                                      | 1,185              | (39.9)    | 22              | (41.5)    | 1,207           | (40.0)    |
| Current                                     | 607                | (20.5)    | 10              | (18.9)    | 617             | (20.4)    |
| Diabetes                                    | 989                | (33.3)    | 13              | (24.5)    | 1,002           | (33.2)    |
| History of hypertension                     | 2,224              | (75.0)    | 40              | (75.5)    | 2,264           | (75.0)    |
| Antihypertensive use                        | 2,512              | (84.7)    | 45              | (84.9)    | 2,557           | (84.7)    |
| ACE-inhibitor or ARB use                    | 1,988              | (67.0)    | 39              | (73.6)    | 2,027           | (67.1)    |
| Statin use                                  | 2,043              | (68.9)    | 38              | (71.7)    | 2,081           | (68.9)    |
| Prior lacunar stroke**                      |                    |           |                 |           |                 |           |
| Yes                                         | 300                | (10.1)    | 8               | (15.1)    | 308             | (10.2)    |
| Missing                                     | 3                  | (0.1)     | 2               | (3.8)     | 5               | (0.2)     |
| Total cholesterol, mg/dL                    | 187.9              | (47.2)    | 192.3           | (42.2)    | 187.9           | (47.1)    |
| High-density lipoprotein cholesterol, mg/dL | 45.4               | (18.5)    | 42.7            | (11.7)    | 45.4            | (18.4)    |
| Systolic blood pressure                     | 143.0              | (18.9)    | 141.0           | (14.4)    | 143.0           | (18.8)    |
| Body mass index, kg/m <sup>2</sup>          | 29.1               | (6.9)     | 28.7            | (5.1)     | 29.1            | (6.8)     |
| eGFR, mL/min/1.73m <sup>2</sup> *           | 80.7               | (18.9)    | 74.7            | (19.5)    | 80.6            | (18.9)    |
| eGFR <60                                    | 454                | (15.3)    | 11              | (20.8)    | 465             | (15.4)    |
| eGFR 60-90                                  | 1,501              | (50.6)    | 26              | (49.1)    | 1,527           | (50.6)    |
| eGFR >90                                    | 1,012              | (34.1)    | 13              | (24.5)    | 1,025           | (33.9)    |
| Missing                                     | 0                  | (0.0)     | 3               | (5.7)     | 3               | (0.1)     |
| White matter hyperintensities score         | 5.5                | (4.1)     | 2.0             | (0.0)     | 5.5             | (4.1)     |
| Missing                                     | 0                  | (0.0)     | 50              | (94.3)    | 50              | (1.7)     |
| Systolic blood pressure target <130         | 1,478              | (49.8)    | 23              | (43.4)    | 1,501           | (49.7)    |

Differences in distribution of categorical variables and means of continuous variables tested using chi-squared and t-test, respectively. \* = p for statistical test < 0.05, \*\* = p < 0.0005. SD = standard deviation, ACE = angiotensin-converting enzyme, ARB = angiotensin receptor blocker, eGFR = estimated glomerular filtration rate

**Table S2. Baseline characteristics of Secondary Preventions of Small Subcortical Strokes trial participants included and excluded in longitudinal analysis.**

| Characteristic                              | Included (n=2,454) |             | Excluded (n=566) |             | Total (N=3,020) |             |
|---------------------------------------------|--------------------|-------------|------------------|-------------|-----------------|-------------|
|                                             | No. or mean        | (%) or (SD) | No. or mean      | (%) or (SD) | No. or mean     | (%) or (SD) |
| Age                                         | 62.9               | (10.7)      | 62.1             | (11.2)      | 62.8            | (10.8)      |
| Male                                        | 1,557              | (63.4)      | 345              | (61.0)      | 1,902           | (63.0)      |
| Race**                                      |                    |             |                  |             |                 |             |
| White                                       | 1,218              | (49.6)      | 320              | (56.5)      | 1,538           | (50.9)      |
| Hispanic                                    | 801                | (32.6)      | 115              | (20.3)      | 916             | (30.3)      |
| Black                                       | 375                | (15.3)      | 117              | (20.7)      | 492             | (16.3)      |
| Other                                       | 60                 | (2.4)       | 14               | (2.5)       | 74              | (2.5)       |
| Smoking*                                    |                    |             |                  |             |                 |             |
| Never                                       | 974                | (39.7)      | 222              | (39.2)      | 1,196           | (39.6)      |
| Former                                      | 1,007              | (41.0)      | 200              | (35.3)      | 1,207           | (40.0)      |
| Current                                     | 473                | (19.3)      | 144              | (25.4)      | 617             | (20.4)      |
| Diabetes                                    | 808                | (32.9)      | 194              | (34.3)      | 1,002           | (33.2)      |
| History of hypertension                     | 1,835              | (74.8)      | 429              | (75.8)      | 2,264           | (75.0)      |
| Antihypertensive use                        | 2,079              | (84.7)      | 478              | (84.5)      | 2,557           | (84.7)      |
| ACE inhibitor or ARB use                    | 1,663              | (67.8)      | 364              | (64.3)      | 2,027           | (67.1)      |
| Statin use                                  | 1,675              | (68.3)      | 406              | (71.7)      | 2,081           | (68.9)      |
| Prior lacunar stroke*                       |                    |             |                  |             |                 |             |
| Yes                                         | 243                | (9.9)       | 65               | (11.5)      | 308             | (10.2)      |
| Missing                                     | 2                  | (0.1)       | 3                | (0.5)       | 5               | (0.2)       |
| Total cholesterol, mg/dL                    | 187.2              | (46.2)      | 191.1            | (50.6)      | 187.9           | (47.1)      |
| High-density lipoprotein cholesterol, mg/dL | 45.4               | (18.3)      | 45.4             | (19.0)      | 45.4            | (18.4)      |
| Systolic blood pressure, mmHg*              | 142.6              | (18.7)      | 144.6            | (19.3)      | 143.0           | (18.8)      |
| Body mass index, kg/m <sup>2</sup>          | 29.1               | (7.0)       | 29.0             | (6.0)       | 29.1            | (6.8)       |
| eGFR, mL/min/1.73m <sup>2</sup>             | 80.6               | (18.6)      | 80.7             | (20.1)      | 80.6            | (18.9)      |
| eGFR <60                                    | 367                | (15.0)      | 98               | (17.3)      | 465             | (15.4)      |
| eGFR 60-90                                  | 1259               | (51.3)      | 268              | (47.3)      | 1527            | (50.6)      |
| eGFR >90                                    | 828                | (33.7)      | 197              | (34.8)      | 1025            | (33.9)      |
| Missing                                     | 0                  | (0.0)       | 3                | (0.5)       | 3               | (0.1)       |
| White matter hyperintensity score           | 5.4                | (4.1)       | 5.8              | (4.2)       | 5.5             | (4.1)       |
| SBP goal <130                               | 1,218              | (49.6)      | 283              | (50.0)      | 1,501           | (49.7)      |

Differences in distribution of categorical variables and means of continuous variables tested using chi-squared and t-test, respectively. \* = p for comparison < 0.05, \*\* = p < 0.0005. SD = standard deviation, ACE = angiotensin-converting enzyme, ARB = angiotensin receptor blocker, eGFR = estimated glomerular filtration rate.

Figure S1. Kaplan-Meier estimates of probability of recurrent stroke among persons randomized to higher vs. lower BP target, stratified by WMH tertile.

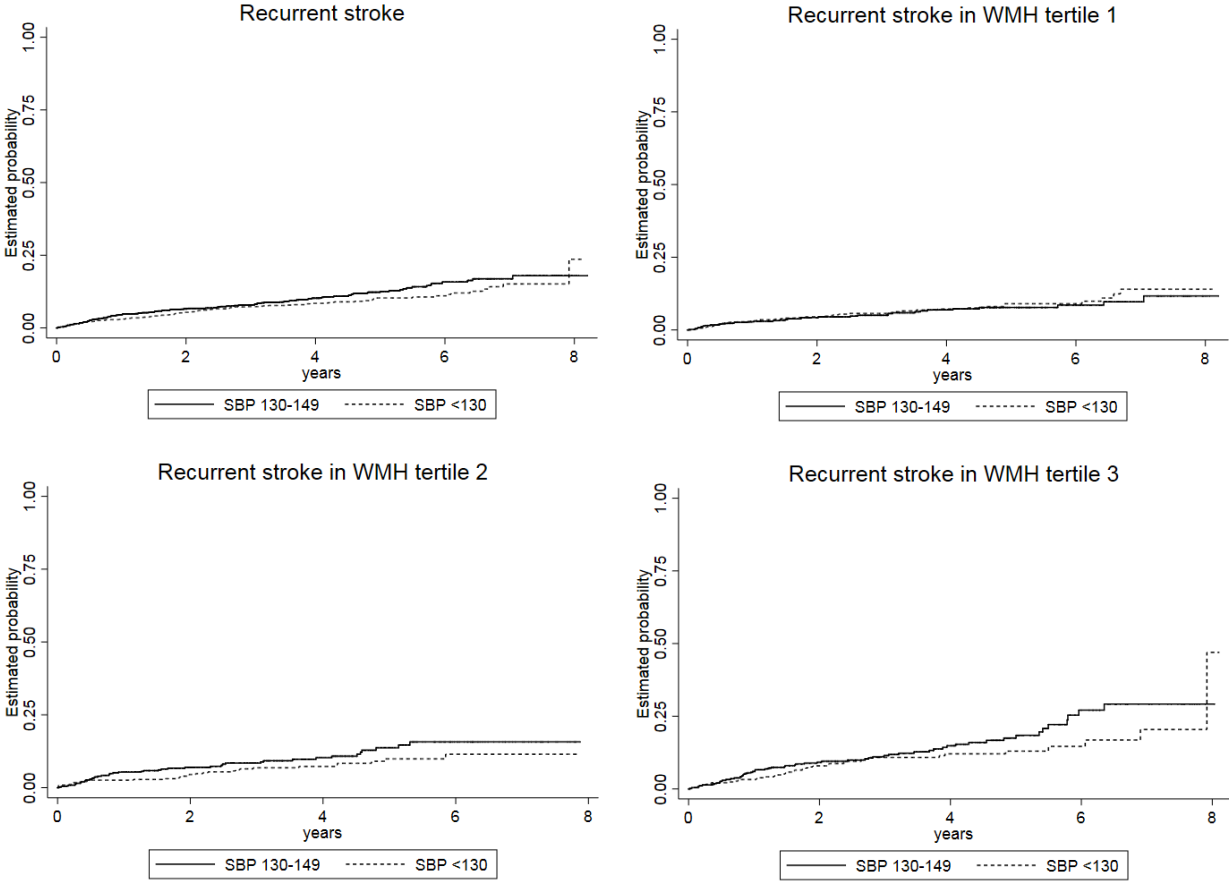

WMH = white matter hyperintensities, SBP = systolic blood pressure.
